# Supplementary material
Source: Royal Society of Chemistry journal article supplement (doi:10.1039/d6ta01220e)
Supplement: d6ta01220e1.pdf [file d6ta01220e1.pdf]

## Friction-triggered self-reactive deep eutectic solvents for tunable lubrication under ultra-heavy load through in situ formation of ultra-thick multi-gradient tribofilm

Yuting Li<sup>a</sup>, Xuanyu Hu<sup>a</sup>, Xiaoyang Dong<sup>b</sup>, Yuhan Yuan<sup>a</sup>, Hao Li<sup>a,\*</sup>, Xiaojun Xu<sup>a</sup>,  
Xiaoqiang Fan<sup>a</sup>, Minhao Zhu<sup>a,c</sup>

<sup>a</sup> Key Laboratory of Advanced Technologies of Materials (Ministry of Education),  
School of Materials Science and Engineering, Southwest Jiaotong University,  
Chengdu 610031, China

<sup>b</sup> College of Physics and Electronic Engineering, Chengdu Normal University,  
Chengdu, Sichuan, 611130, China

<sup>c</sup> Tribology Research Institute, School of Mechanical Engineering, Southwest  
Jiaotong University, Chengdu 610031, China

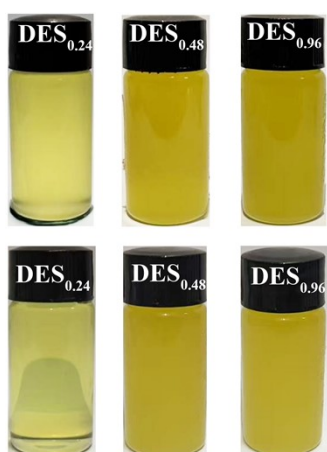

**Fig. S1** Photographs of three friction-triggered self-reactive DESs samples before and after vacuum drying. The top row shows the samples before drying, and the bottom

---

\*Corresponding Author. E-mail address: lihao@swjtu.edu.cn (H. Li).

row shows the samples after drying.

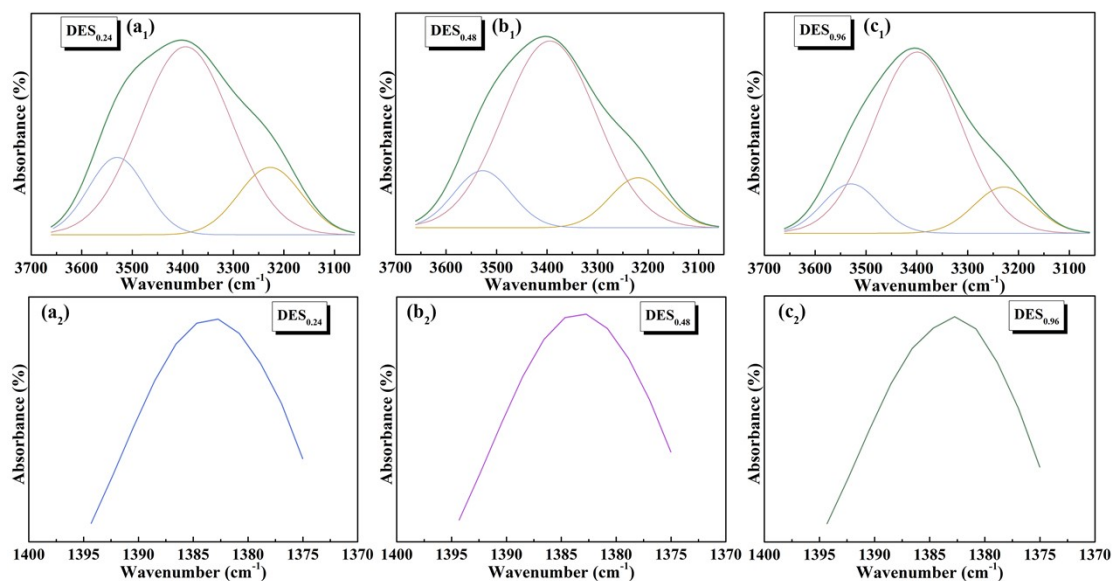

**Fig. S2** FTIR spectra focusing on the part of hydrogen bonding interactions in the region of 3000-3600  $\text{cm}^{-1}$  and 1395-1375  $\text{cm}^{-1}$ .

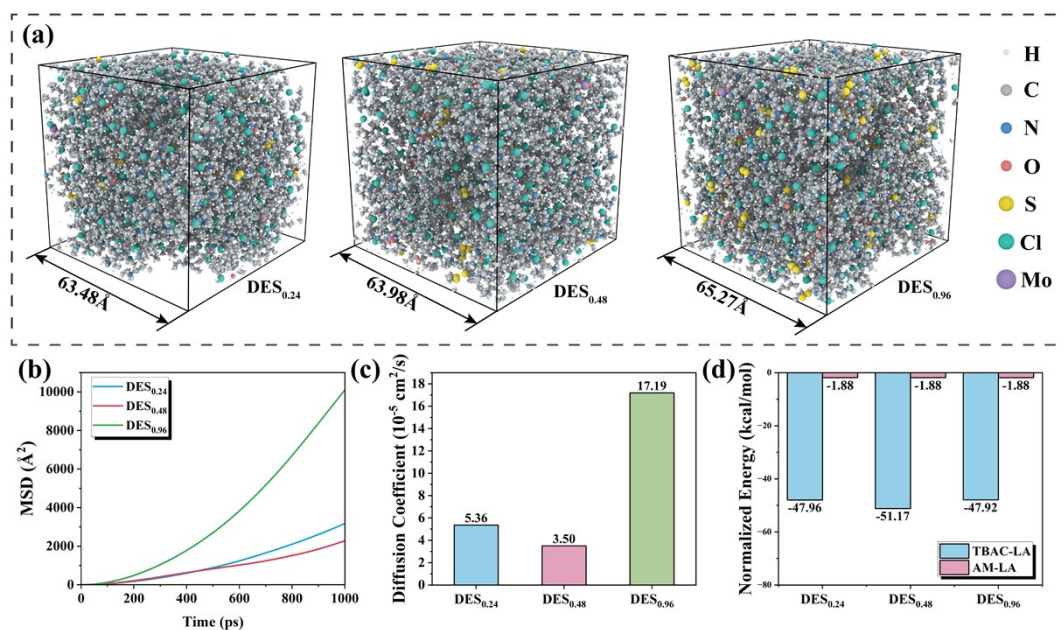

**Fig. S3** (a) Simulation configuration of the friction-triggered self-reactive DESs, (b) Mean square displacement (MSD) as a function of time for  $\text{DES}_{0.24}$ ,  $\text{DES}_{0.48}$ , and  $\text{DES}_{0.96}$ , (c) Diffusion coefficients calculated from the MSD curves, (d) Normalized interaction energies between TBAC-LA, AM-LA, and LA-LA with the three DESs.

**Table S1** The average number and proportion of hydrogen bonds in three friction-triggered self-reactive DESs.

| DES                                            | DES <sub>0.24</sub> |                | DES <sub>0.48</sub> |                | DES <sub>0.96</sub> |                |
|------------------------------------------------|---------------------|----------------|---------------------|----------------|---------------------|----------------|
|                                                | Average Count       | Percentage (%) | Average Count       | Percentage (%) | Average Count       | Percentage (%) |
| Cl-LA                                          | 21.7526             | 36.29%         | 45.4418             | 52.86%         | 88.5707             | 67.54%         |
| Cl-NH <sub>4</sub> <sup>+</sup>                | 35.1354             | 58.62%         | 36.6737             | 42.66%         | 32.4213             | 24.72%         |
| LA-NH <sub>4</sub> <sup>+</sup>                | 1.0465              | 1.75%          | 2.8541              | 3.32%          | 4.0025              | 3.05%          |
| LA-MoO <sub>4</sub>                            | 1                   | 1.67%          | 1.0001              | 1.16%          | 2.9815              | 2.27%          |
| MoO <sub>4</sub> -NH <sub>4</sub> <sup>+</sup> | 1                   | 1.67%          | 0                   | 0.00%          | 2.8636              | 2.18%          |
| LA-LA                                          | 0.0075              | 0.01%          | 0                   | 0.00%          | 0.3003              | 0.23%          |
| ALL                                            | 59.9420             |                | 85.9697             |                | 131.1399            |                |

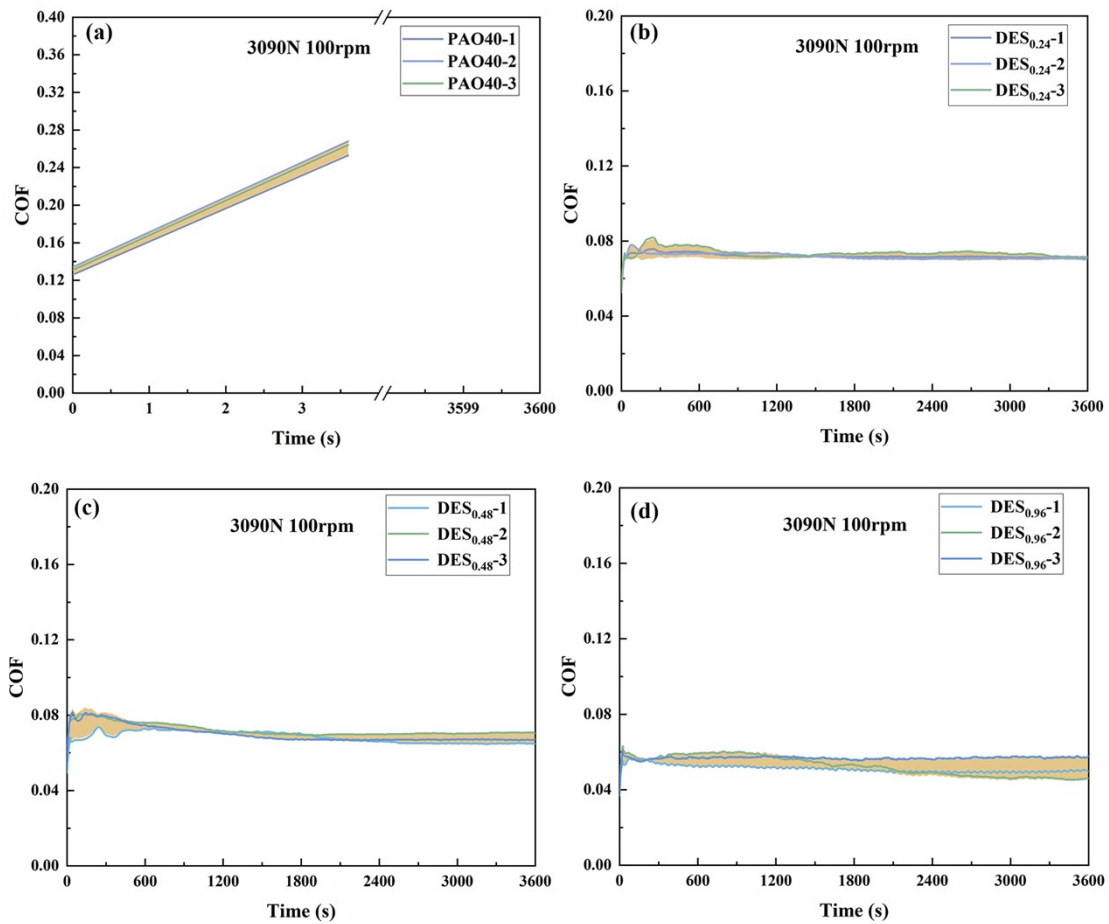

**Fig. S4** COF curves as a function of time and the corresponding error ranges obtained from three repeated friction tests under 3090 N for (a) PAO 40, (b) DES<sub>0.24</sub>, (c) DES<sub>0.48</sub>, and (d) DES<sub>0.96</sub>.

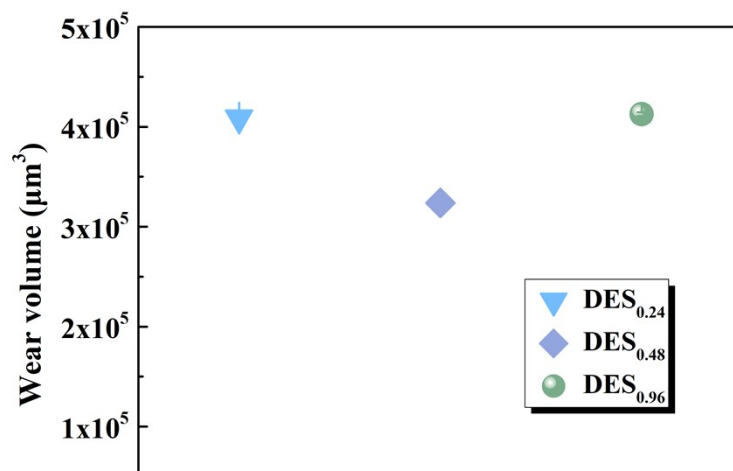

**Fig. S5** The wear volume of the friction-triggered self-reactive DESs under 3090 N and 100 rpm.

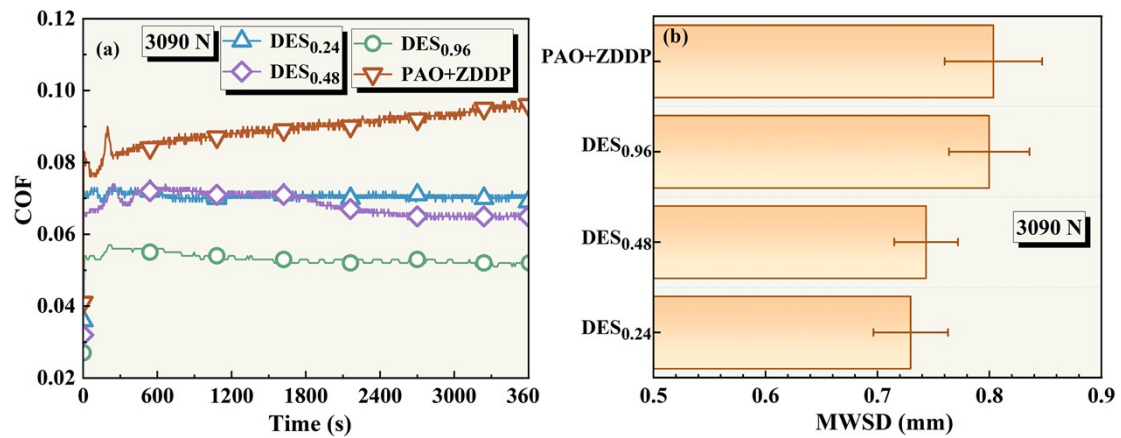

**Fig. S6** (a) Friction curves and (b) MWSD of friction-triggered self-reactive DESs at 100 rpm and 3090 N.

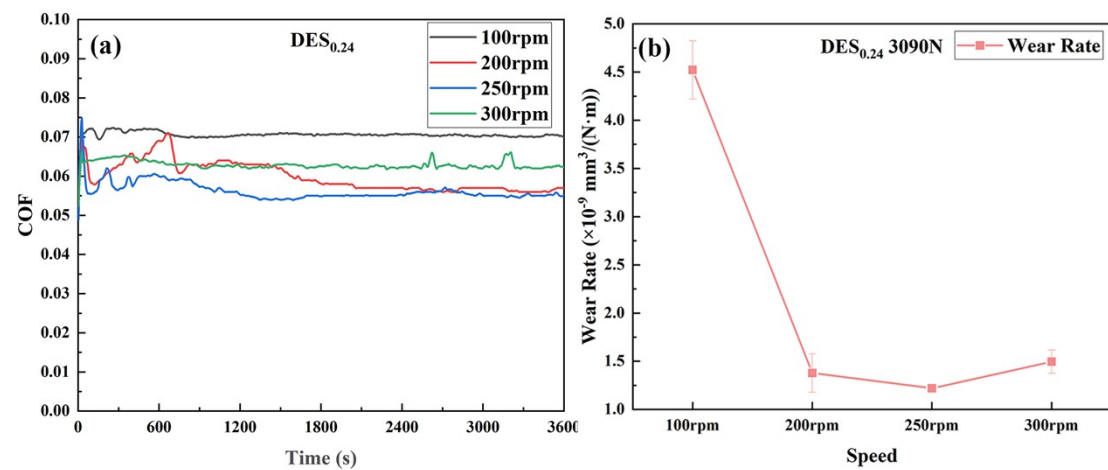

**Fig. S7** (a) Evolution of COF values over time for DES<sub>0.24</sub> at rotational speeds ranging from 100 r/min to 300 r/min and (b) corresponding WSD values.

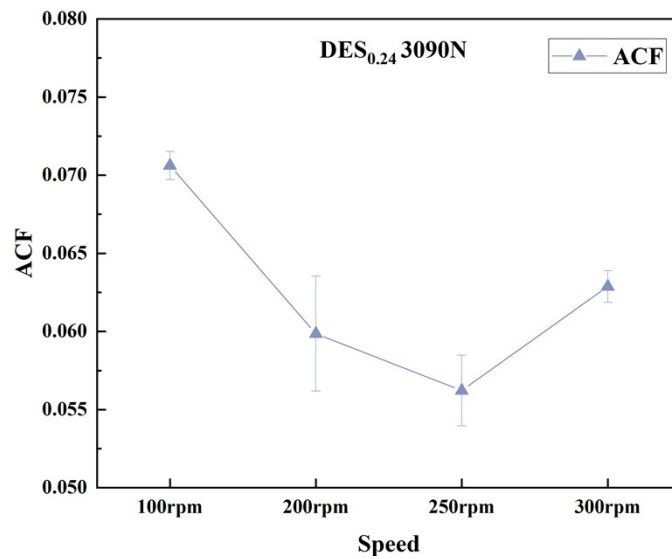

**Fig. S8** Average COF values of DES<sub>0.24</sub> at different rotational speeds.

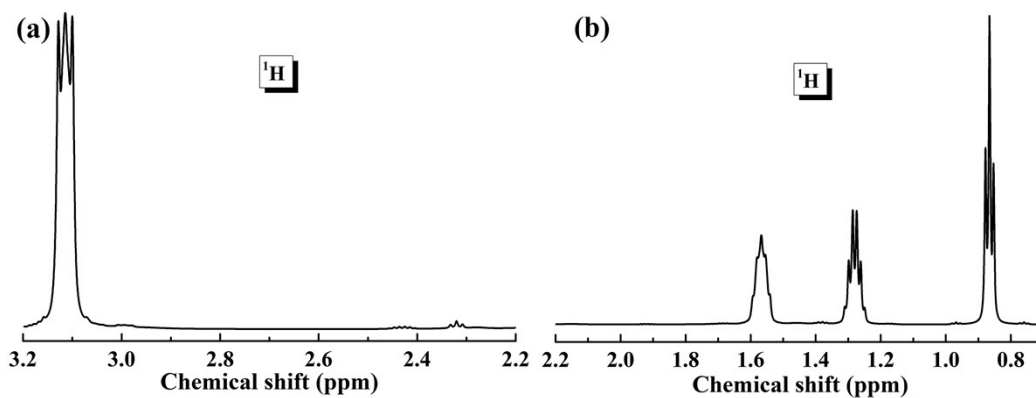

**Fig. S9** <sup>1</sup>H NMR of the DES<sub>0.96</sub> after the friction experiment.

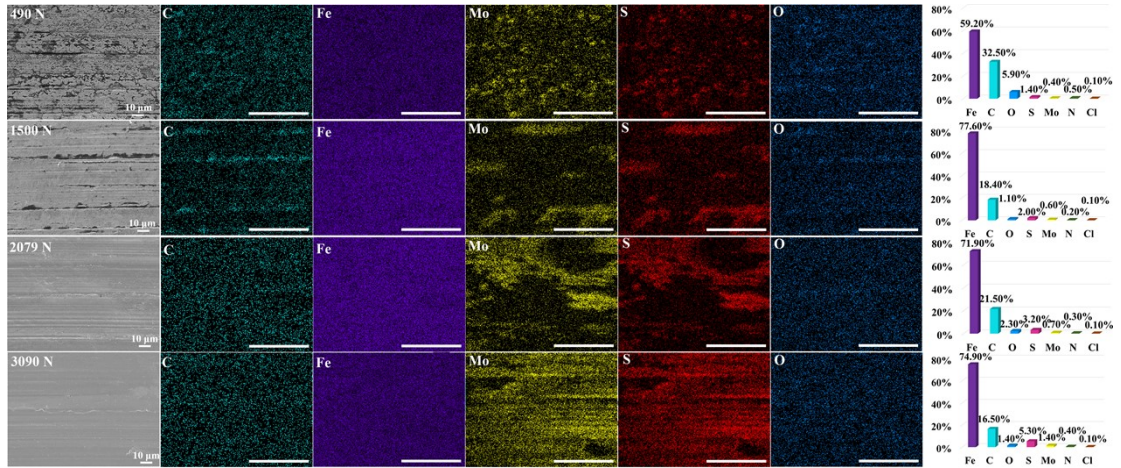

**Fig. S10** The surface topographies, EDS mappings and atomic percent of the wear scars achieved by friction-triggered self-reactive  $DES_{0.96}$  at 100 rpm and 490 N, 1500 N, 2079 N and 3090 N.

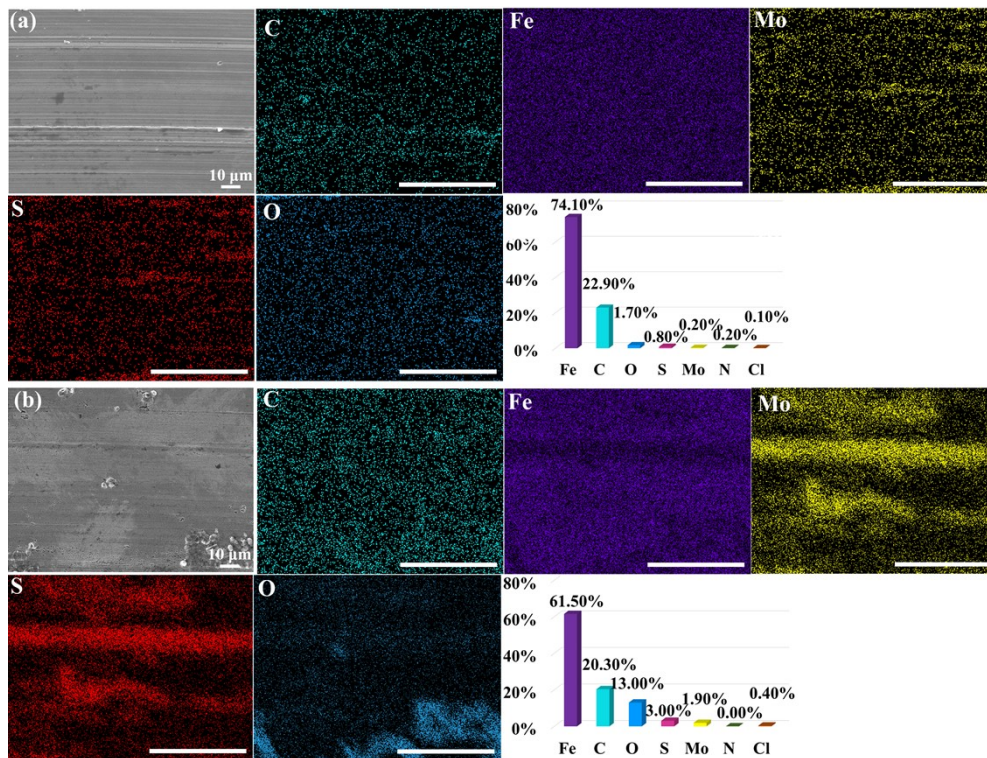

**Fig. S11** The surface topographies, EDS mappings and atomic percent of the wear scars achieved by friction-triggered self-reactive (a)  $DES_{0.96}$  at 1200 rpm and 490 N, and (b)  $DES_{0.24}$  at 100 rpm and 3090 N.

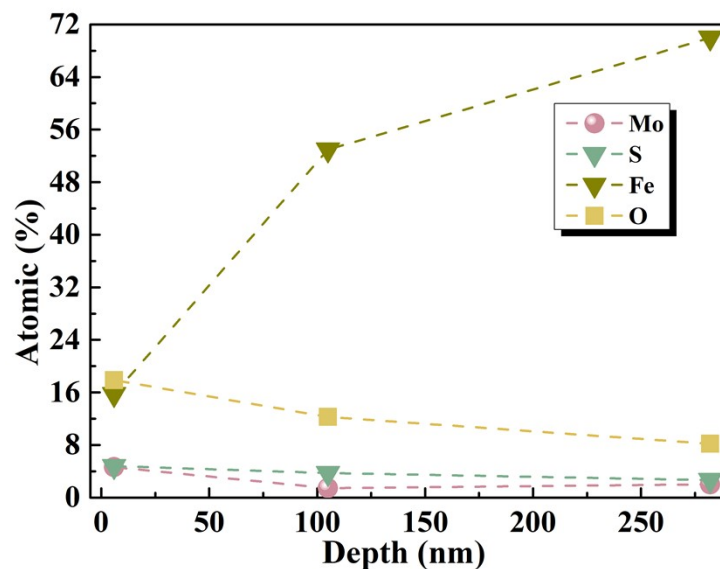

**Fig. S12** Fe, O, Mo and S atomic concentrations at different depths, obtained by XPS sputter test on the wear track of DES<sub>0.24</sub>.

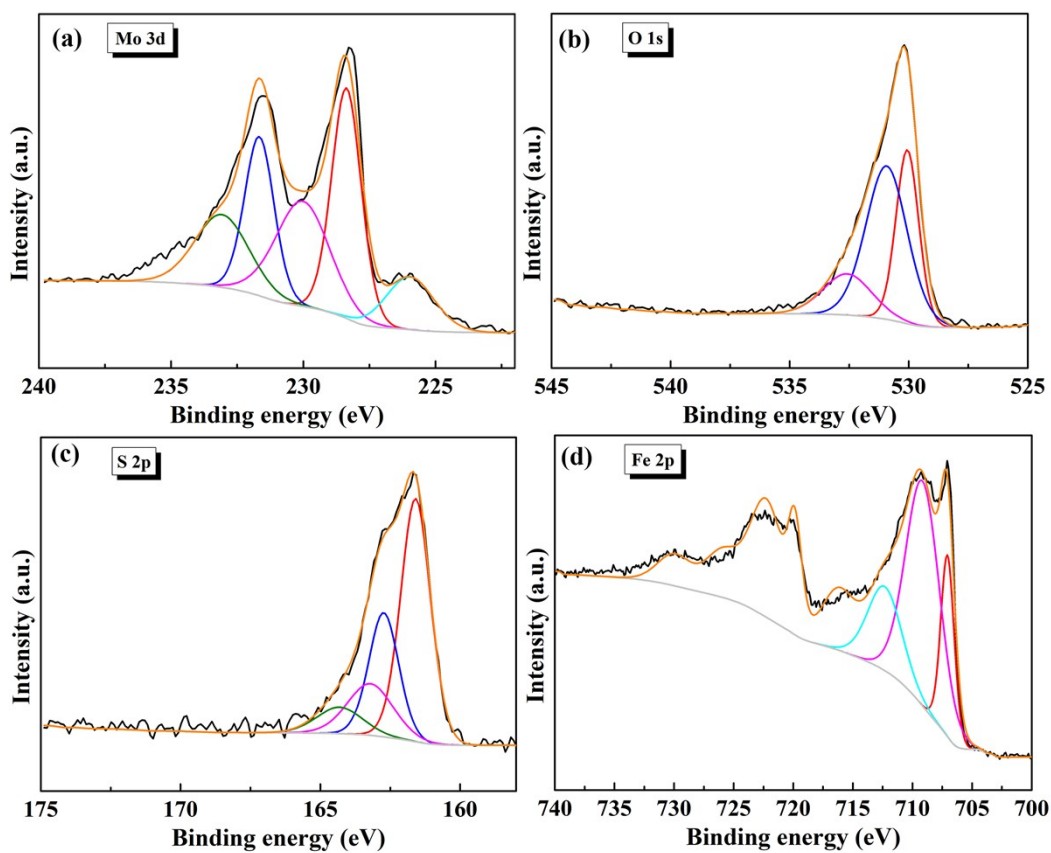

**Fig. S13** Mo 3d, S 2p, O 1 s and Fe 2p high-resolution XPS spectra on the worn

surface at a sputtering depth of 5 nm.

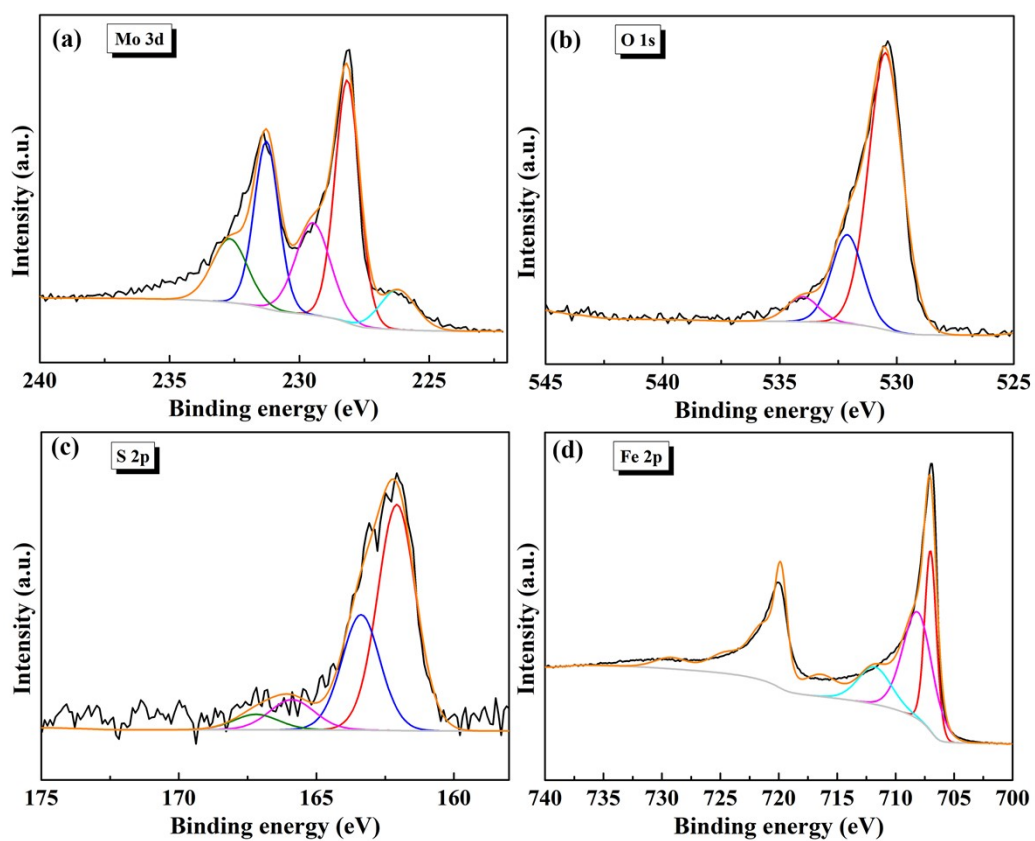

**Fig. S14** Mo 3d, S 2p, O 1 s and Fe 2p high-resolution XPS spectra on the worn surface at a sputtering depth of 105 nm.

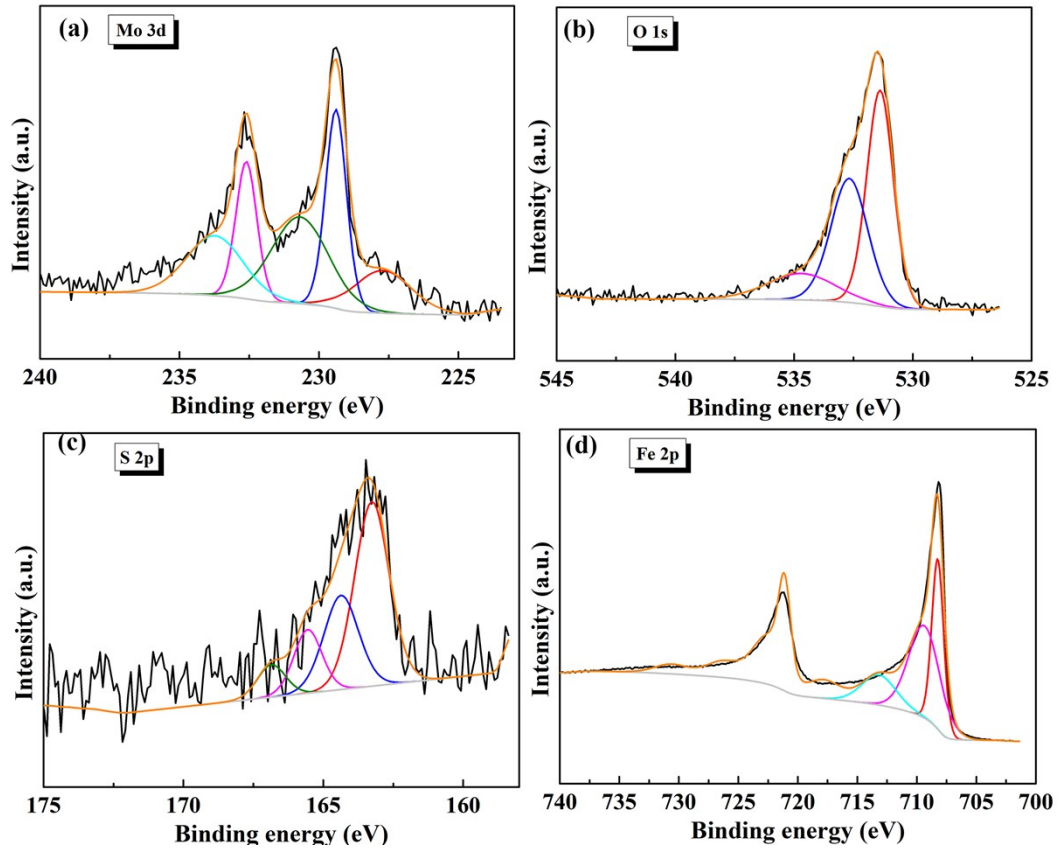

**Fig. 15** Mo 3d, S 2p, O 1 s and Fe 2p high-resolution XPS spectra on the worn surface at a sputtering depth of 282 nm.

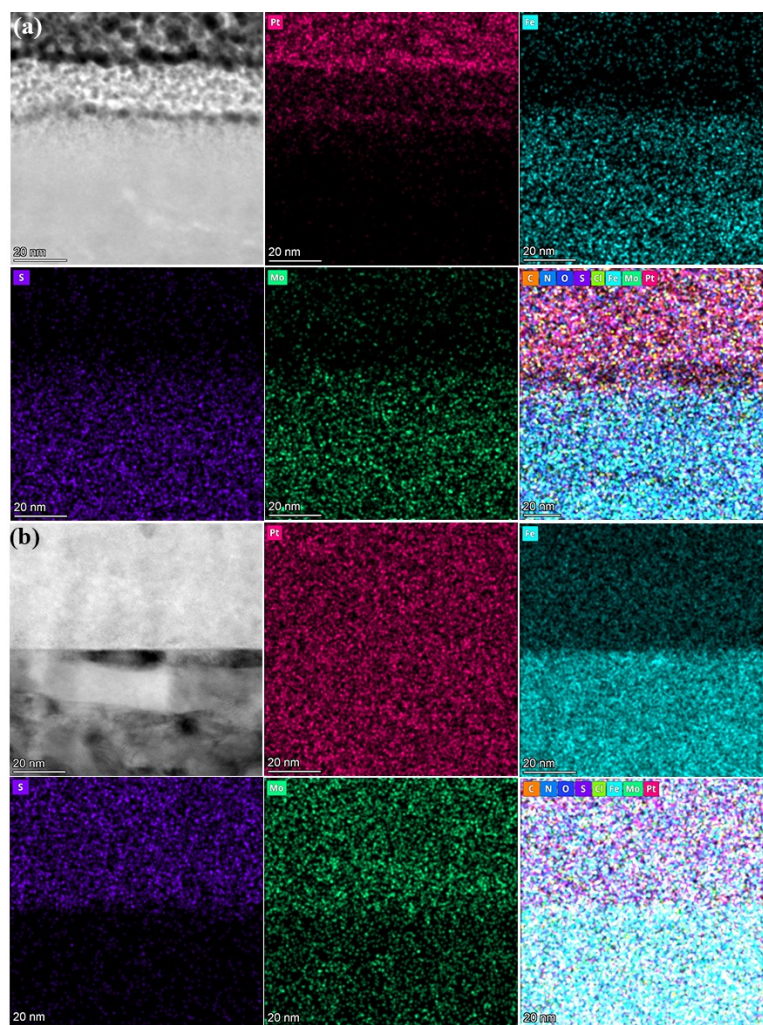

**Fig. S16** FIB-TEM analysis results of the friction-induced tribofilm through chemical reaction between HBDs and HBA in the self-reactive DES at 490 N and 100 rpm: (a) the interface between the upper film and the Pt protective layer, (b) the interface between the lower tribofilm and the steel substrate.

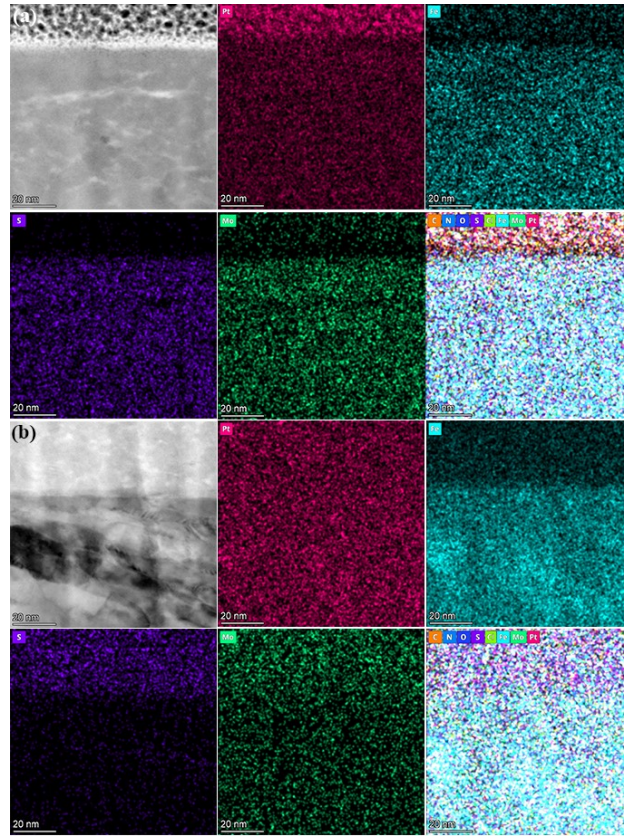

**Fig. S17** FIB-TEM analysis results of the friction-induced tribofilm through chemical reaction between HBDs and HBA in the self-reactive DES at 3090 N and 100 rpm: (a) the interface between the upper film and the Pt protective layer, (b) the interface between the lower tribofilm and the steel substrate.
